# Supplementary material for: Purification, Characterization, and Anti-Inflammatory Potential of Free and Bound Polyphenols Extracted from Rosa roxburghii Tratt Pomace
Source: MDPI journal article supplement (doi:10.3390/foods13132044), 2024-06-27
Supplement: s1 [file foods-3038286-supplementary.pdf › foods-3038286-supplementary.pdf]

**Table S1.** Primers used for TNF- $\alpha$ , IL-1 $\beta$ , iNOS, and GAPDH

| mRNA          | Primer    | Sequence (5'-3')        | Size (bp) |
|---------------|-----------|-------------------------|-----------|
| TNF- $\alpha$ | Sense     | TGTCTCAGCCTCTTCTCATTCC  | 152       |
|               | Antisense | TTTGTGAGTGTGAGGGTCTGG   |           |
| IL-1 $\beta$  | Sense     | GGGAAACAACAGTGGTCAGG    | 248       |
|               | Antisense | CCATCAGAGGCAAGGAGGA     |           |
| iNOS          | Sense     | ATCCGATTTAGAGTCTTGGTGAA | 83        |
|               | Antisense | GTGGCTCTGACCCGTGAAG     |           |
| GAPDH         | Sense     | GGTTGTCTCCTGCGACTTCA    | 183       |
|               | Antisense | TGGTCCAGGGTTTCTTACTCC   |           |

**Table S2.** Kinetic parameters for RRTP-FP adsorption onto the AB-8 resin

| Dynamics Models                | Kinetic Equations                      | Parameters                                                                                                         |
|--------------------------------|----------------------------------------|--------------------------------------------------------------------------------------------------------------------|
| Pseudo-first-order model       | $\ln(q_e - q_t) = -0.32637t + 0.36252$ | $k_1 = 0.32637$<br>$R^2 = 0.96463$<br>$q_e = 1.436 \text{ mg/g}$                                                   |
| Pseudo-second-order model      | $t/q_t = 0.39353t + 0.71441$           | $k_2 = 0.39353$<br>$R^2 = 0.99833$<br>$q_e = 2.207 \text{ mg/g}$                                                   |
| Intra-particle diffusion model | $q_t = 0.98432t^{1/2} + 0.09272$       | $k_p = 0.98432 \text{ mg} \cdot (\text{g} \cdot \text{h})^{-1/2}$<br>$R^2 = 0.97614$<br>$C = 0.09272 \text{ mg/g}$ |
|                                | $q_t = 0.12189t^{1/2} + 1.82266$       | $k_p = 0.12189 \text{ mg} \cdot (\text{g} \cdot \text{h})^{-1/2}$<br>$R^2 = 0.89198$<br>$C = 1.82266 \text{ mg/g}$ |
|                                | $q_t = 0.10028t^{1/2} + 1.93999$       | $k_p = 0.10028 \text{ mg} \cdot (\text{g} \cdot \text{h})^{-1/2}$<br>$R^2 = 0.9842$<br>$C = 1.93999 \text{ mg/g}$  |

**Table S3.** Kinetic parameters for RRTP-BP adsorption onto the AB-8 resin

| Dynamics Models                | Kinetic Equations                      | Parameters                                                                                                         |
|--------------------------------|----------------------------------------|--------------------------------------------------------------------------------------------------------------------|
| Pseudo-first-order model       | $\ln(q_e - q_t) = -0.30385t + 1.42905$ | $k_1 = 0.30385$<br>$R^2 = 0.97412$<br>$q_e = 4.174 \text{ mg/g}$                                                   |
| Pseudo-second-order model      | $t/q_t = 0.1295t + 0.14128$            | $k_2 = 0.1295$<br>$R^2 = 0.9995$<br>$q_e = 7.078 \text{ mg/g}$                                                     |
| Intra-particle diffusion model | $q_t = 2.09645t^{1/2} + 1.86028$       | $k_p = 2.09645 \text{ mg} \cdot (\text{g} \cdot \text{h})^{-1/2}$<br>$R^2 = 0.95771$<br>$C = 1.86028 \text{ mg/g}$ |
|                                | $q_t = 0.59721t^{1/2} + 5.08271$       | $k_p = 0.59721 \text{ mg} \cdot (\text{g} \cdot \text{h})^{-1/2}$<br>$R^2 = 0.97534$<br>$C = 5.08271 \text{ mg/g}$ |
|                                | $q_t = 0.06217t^{1/2} + 6.89306$       | $k_p = 0.06217 \text{ mg} \cdot (\text{g} \cdot \text{h})^{-1/2}$<br>$R^2 = 0.98113$<br>$C = 6.89306 \text{ mg/g}$ |
|                                |                                        |                                                                                                                    |

**Table S4.** Total phenolic content of RRTP-FP, RRTP-BP, P-RRTP-FP, and P-RRTP-BP \*

| Samples   | Yield (%)  | Total phenolic content (mg GAE/g E) |
|-----------|------------|-------------------------------------|
| RRTP-FP   | 23.71±2.80 | 213.33±8.57                         |
| RRTP-BP   | 2.99±0.28  | 501.86±4.86                         |
| P-RRTP-FP | 10.22±1.2  | 433.79±12.78                        |
| P-RRTP-BP | 1.07±0.74  | 833.11±13.92                        |

\*RRTP: *Rosa roxburghii* Tratt pomace; RRTP-FP: free polyphenols extracted from RRTP; RRTP-BP: bound polyphenols extracted from RRTP; P-RRTP-FP: purified products of RRTP-FP; P-RRTP-BP: purified products of RRTP-BP. Data are expressed as mean ± standard deviation ( $n = 3$ ).
